# Supplementary material
Source: PubMed Central journal article supplement (PMC4352963)
Supplement: kccy-14-74-s002.pdf [file kccy-14-74-s002.pdf]

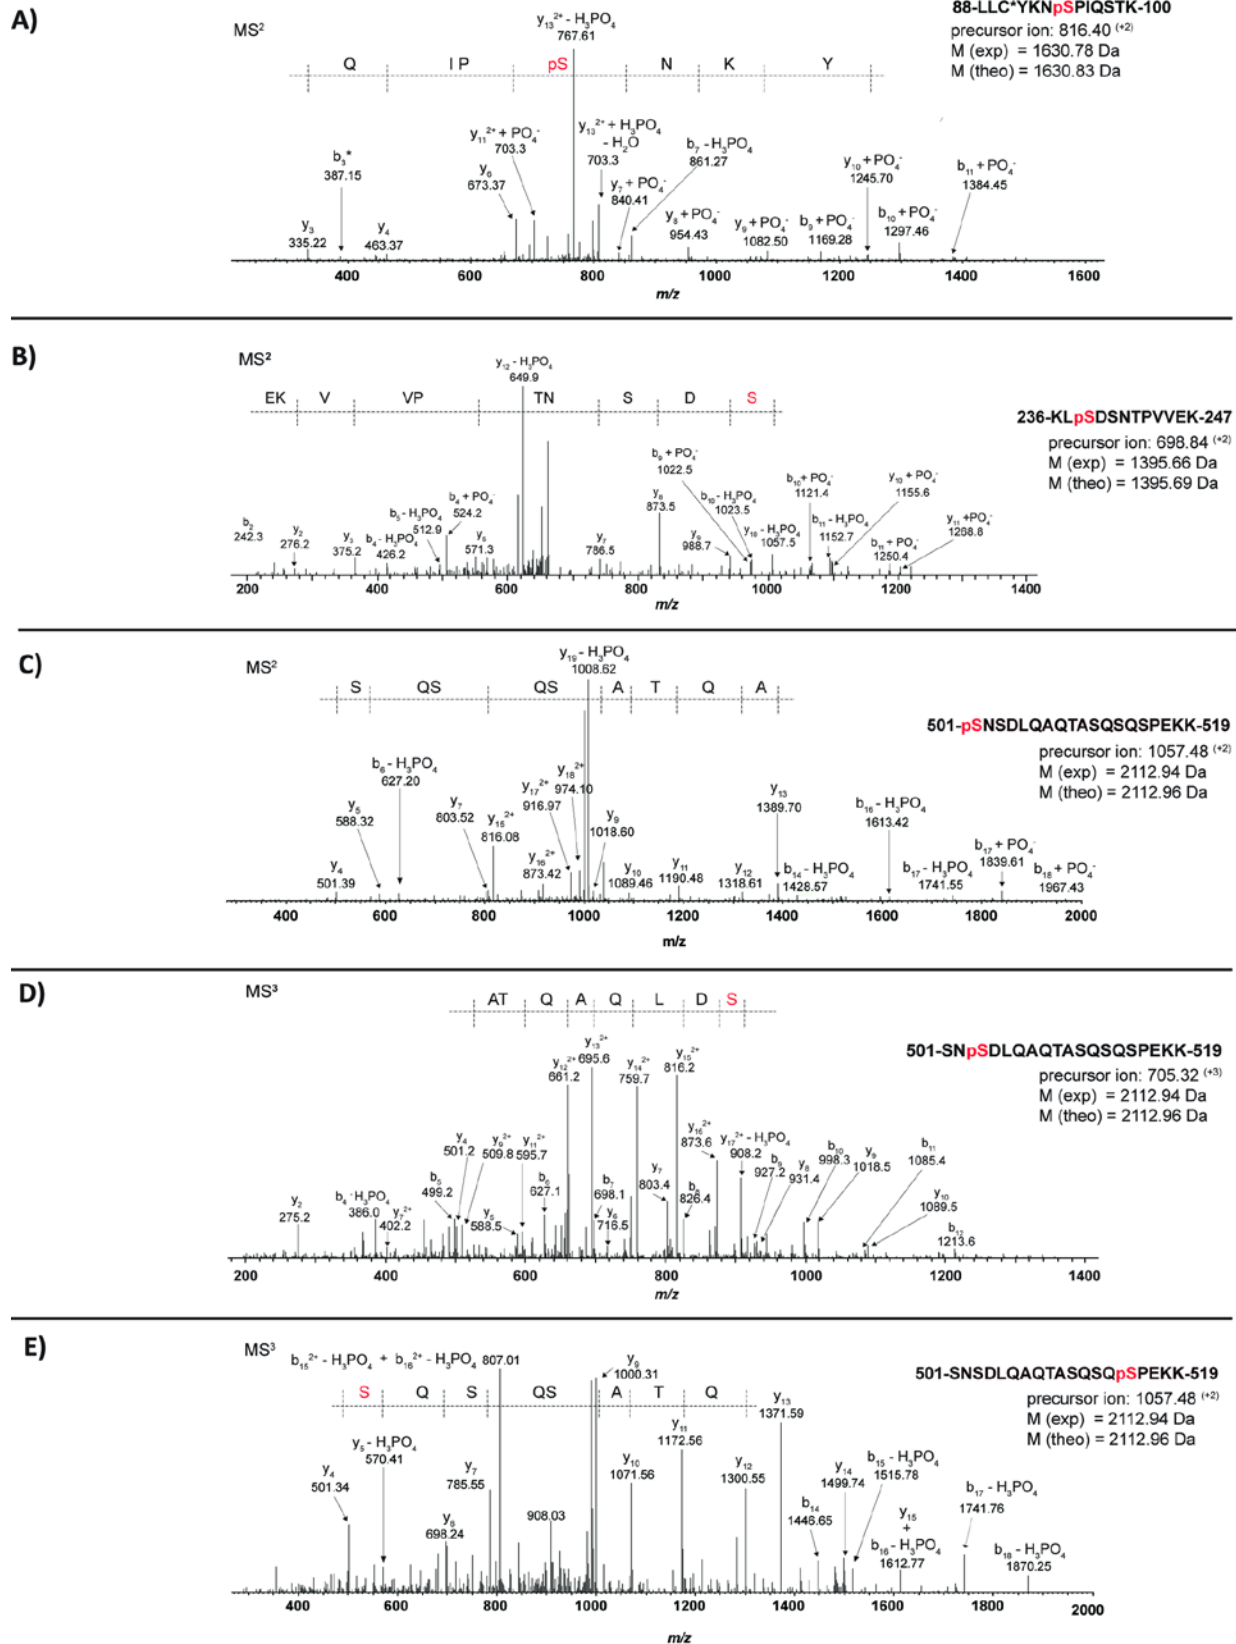

**Supplemental Figure 1. LC-MS/MS spectra of phosphopeptides identified in the Cac1p subunit.** For each phosphopeptide, the experimental and theoretical masses of the non-fragmented peptides are indicated. The experimental masses indicate the presence of a single phosphate in each peptide.

**A) Phosphorylation of S94:** The  $y_7^+ PO_4^-$ ,  $b_9^+ PO_4^-$  and  $b_{10}^+ PO_4^-$  ions are all consistent with phosphorylation of S94. The  $y_3$ ,  $y_4$  and  $y_6$  ions are inconsistent with phosphorylation of S98 or T99. \*=Cysteine carbamylation caused by *in vitro* alkylation of Cac1p prior to trypsin digestion.

**B) Phosphorylation of S238:** The  $y_{10}^+ PO_4^-$ ,  $y_{11}^+ PO_4^-$  and  $b_4^+ PO_4^-$  ions are all consistent with phosphorylation of S238. The  $y_7$ ,  $y_8$  and  $y_9$  ions are inconsistent with phosphorylation of S240 or T242.

**C) Phosphorylation of S501:** The  $y_5$ ,  $y_7$ ,  $y_9$ ,  $y_{11}$ ,  $y_{15}^{2+}$ ,  $y_{16}$ ,  $y_{16}^{2+}$ ,  $y_{17}^{2+}$  and  $y_{18}^{2+}$  ions are inconsistent with phosphorylation at sites other than S501.

**D) Phosphorylation of S503:** The  $y_{17}^{2+}-H_3PO_4$  ion corresponds to a 98Da phosphate loss during  $MS^3$  fragmentation of the  $y_{17}^{2+}$  ion phosphorylated at S503. The  $y_5$ ,  $y_6$ ,  $y_8$ ,  $y_9$ ,  $y_{10}$ ,  $y_{11}^{2+}$ ,  $y_{13}^{2+}$ ,  $y_{14}^{2+}$ ,  $y_{15}^{2+}$  and  $y_{16}^{2+}$  ions are inconsistent with phosphorylation at sites other than S501 or S503.

**E) Phosphorylation of S515:** The  $y_5-H_3PO_4$  ion corresponds to a 98Da phosphate loss during  $MS^3$  fragmentation of the  $y_5$  ion phosphorylated at S515. The  $b_{14}$  ion is inconsistent with phosphorylation at sites other than S515.

**Details on the Experimental procedures are available upon request.**
